# Supplementary material
Source: Springer Nature journal article supplement (https://www.springermedizin.de/resource/supplementary/12883_2010_567_MOESM1_ESM.pdf/9455344)

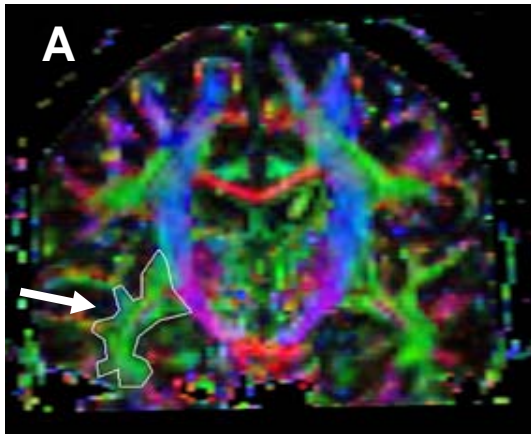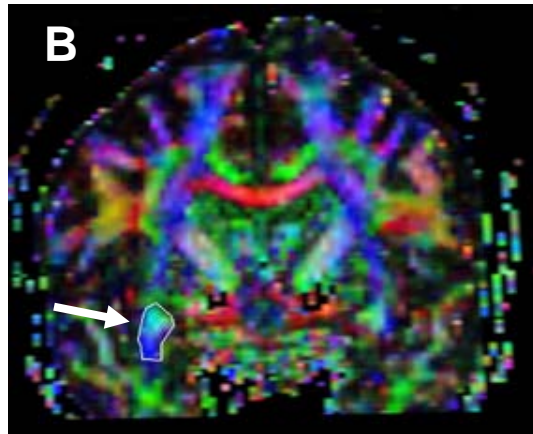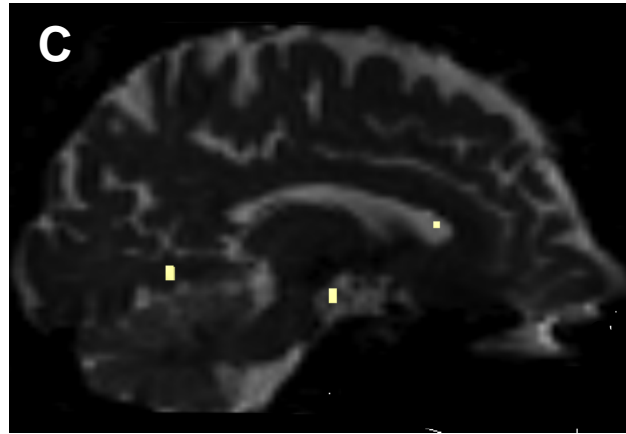

Supplement: MOESM1 [file 9455344]
